# Supplementary material for: Facile fabrication and characterization of hierarchically porous calcium carbonate microspheres
Source: Royal Society of Chemistry journal article supplement (doi:10.1039/b406839d), 2004-01-01
Supplement: b406839d.pdf [file b406839d.pdf]

### Supporting Information

#### Facile fabrication and characterization of hierarchically porous calcium carbonate microspheres

Jiaguo Yu, Jimmy C. Yu, Lizhi Zhang, Xinchun Wang, Ling Wu

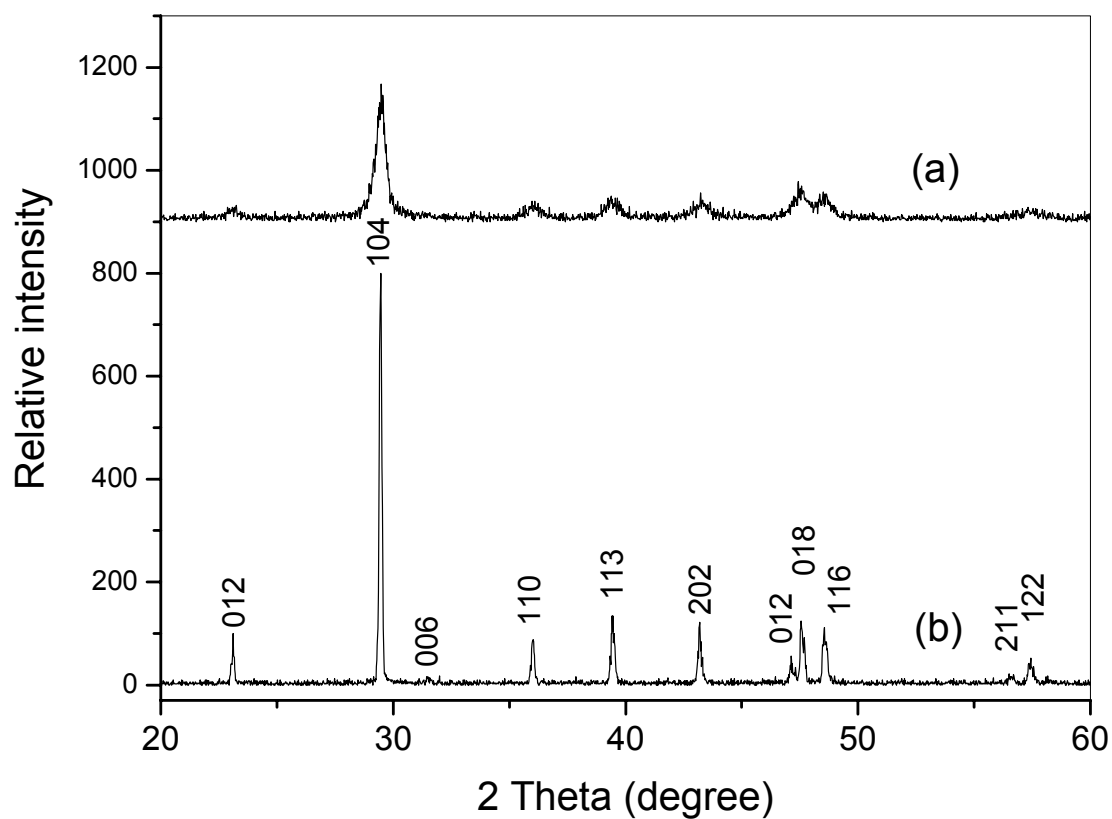

**Figure S1** XRD patterns of CaCO<sub>3</sub> particles obtained (a) in the presence of PSMA (1.0 g/L) and (b) in the absence of PSMA and aged at 25°C for 24 h.

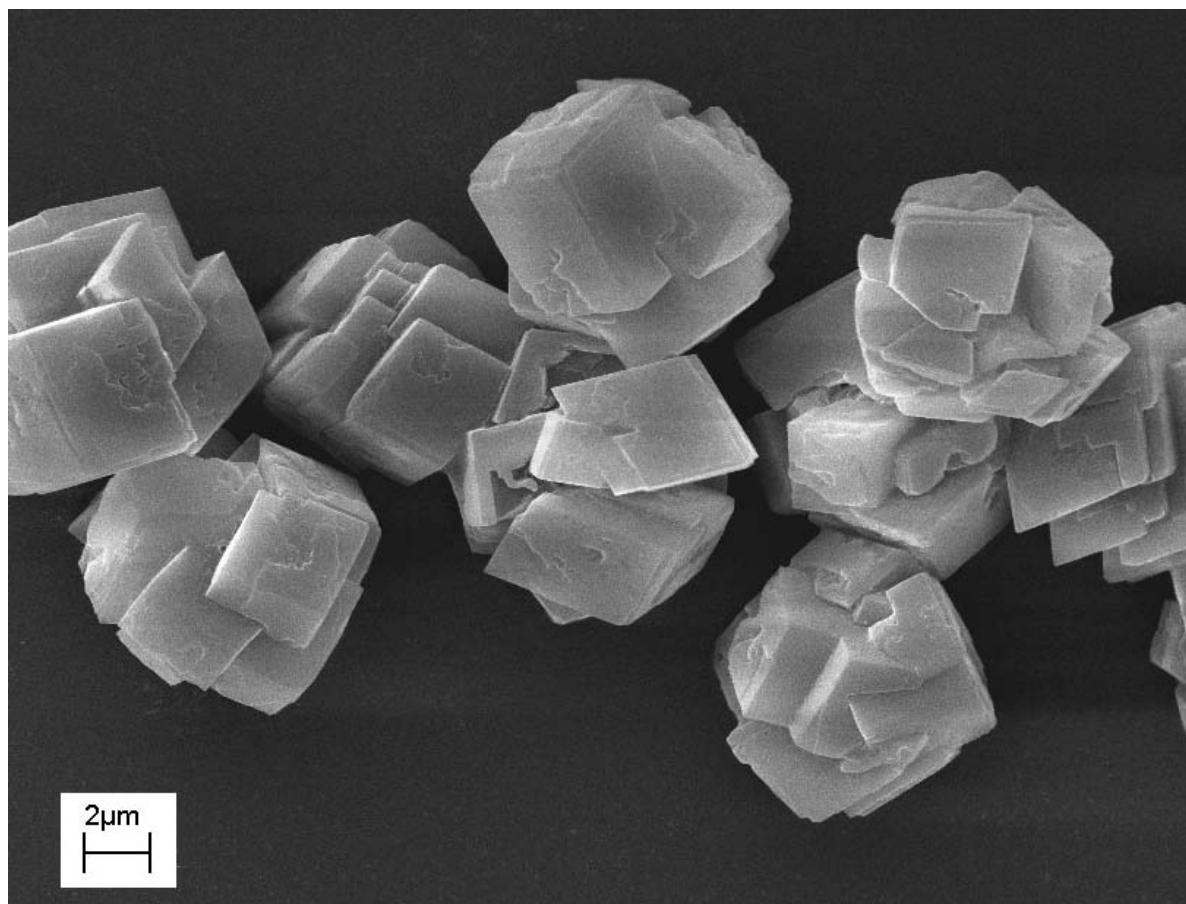

**Figure S2** SEM images of CaCO<sub>3</sub> particles obtained in the absence of PSMA after aging at 25°C for 24 h.

# Supplementary Material (ESI) for Chemical Communications  
# This journal is © The Royal Society of Chemistry 2004

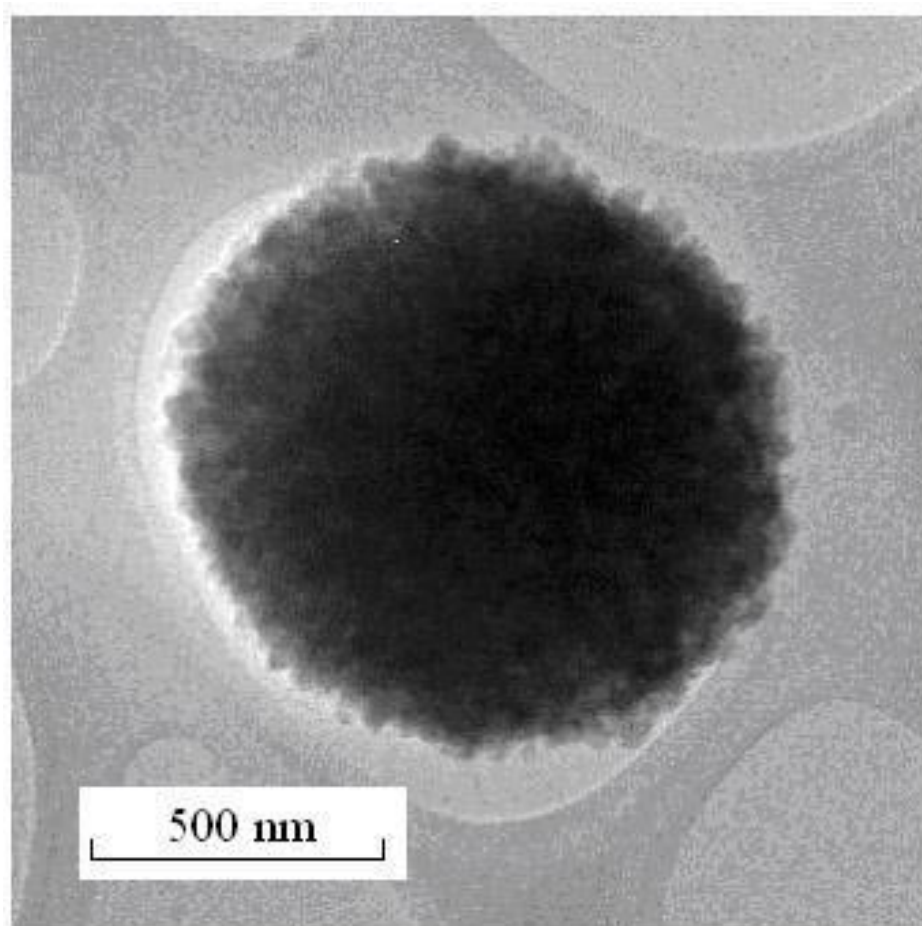

**Figure S3** TEM images of CaCO<sub>3</sub> particles obtained in the presence of PSMA (1.0 g/L) after aging at 25°C for 20 min.

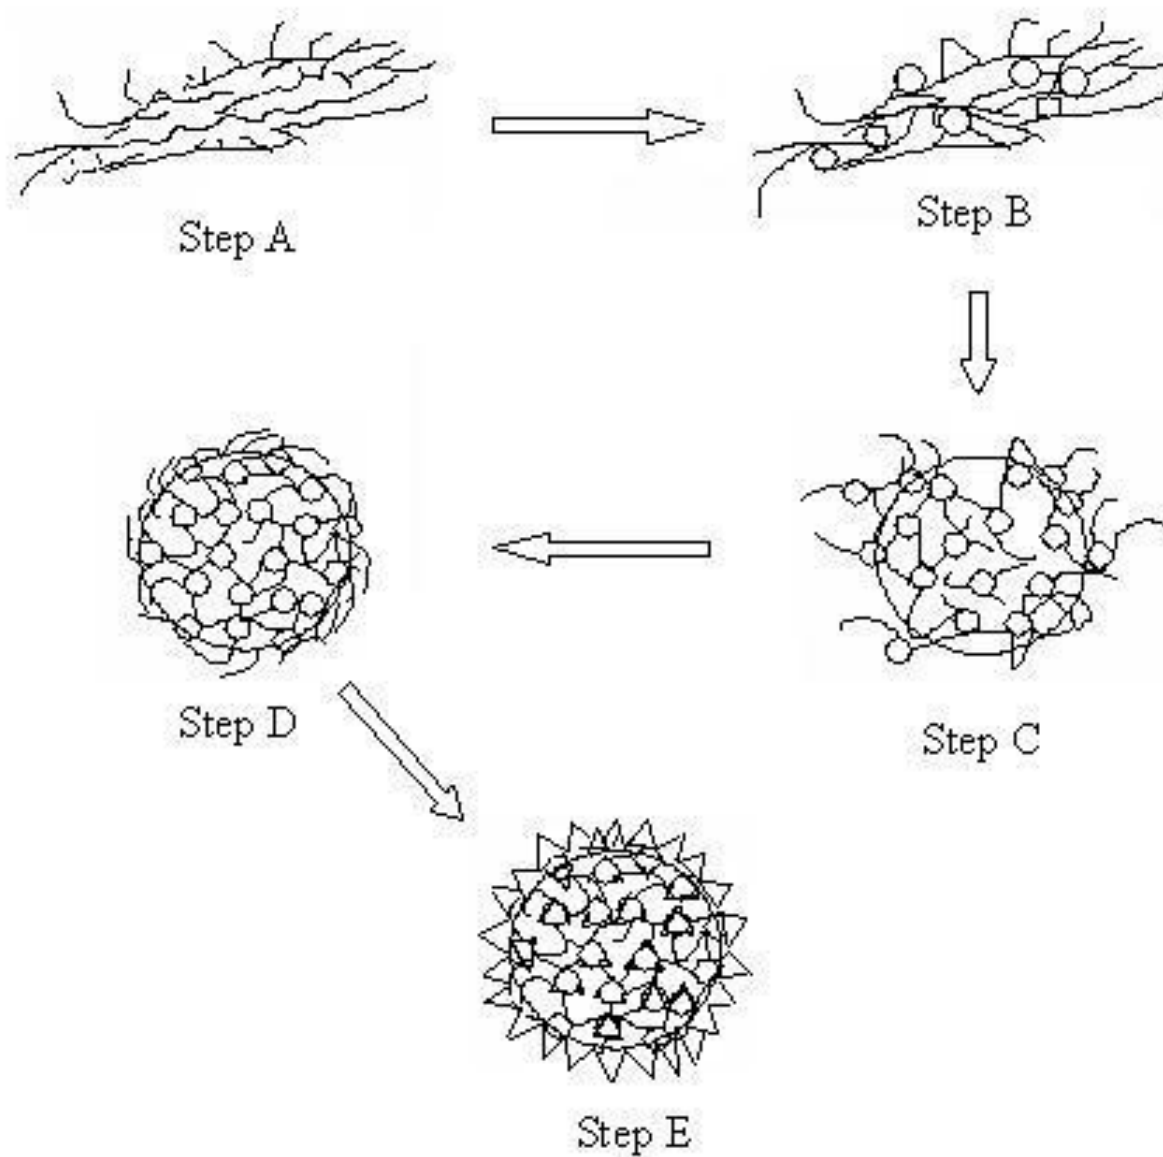

**Figure S4** Proposed formation mechanism for sponge-like porous microspheres.
